# Supplementary material for: Algae from Aiptasia egesta are robust representations of Symbiodiniaceae in the free-living state
Source: PeerJ. 2022 Jul 29;10:e13796. doi: 10.7717/peerj.13796 (PMC9341449; doi:10.7717/peerj.13796)
Supplement: Data S1 — Raw data including symbiont density, mitotic index, qPCR, egesta release time-lapse data, and Fv/Fm data. [file peerj-10-13796-s002.xlsx]

## Sheet: Time-lapse data
Experiment	Image_name	Time	Lights	Total egesta	New egesta	Algae per anemone
4	IMG_0001	10:35PM	Off	32	0	0
4	IMG_0002	11:35PM	Off	37	5	0.263158
4	IMG_0003	12:35AM	Off	39	2	0.105263
4	IMG_0004	1:35AM	Off	112	73	3.84211
4	IMG_0005	2:35AM	Off	230	118	6.21053
4	IMG_0006	3:35AM	Off	254	24	1.26316
4	IMG_0007	4:35AM	Off	264	10	0.526316
4	IMG_0008	5:35AM	Off	276	12	0.631579
4	IMG_0009	6:35AM	Off	282	6	0.315789
4	IMG_0010	7:35AM	On	288	6	0.315789
4	IMG_0011	8:35AM	On	289	1	0.0526316
4	IMG_0012	9:35AM	On	293	4	0.210526
4	IMG_0013	10:35AM	On	293	0	0
4	IMG_0014	11:35AM	On	294	1	0.0526316
4	IMG_0015	12:35PM	On	285	0	0
4	IMG_0016	1:35PM	On	290	5	0.263158
4	IMG_0017	2:35PM	On	293	3	0.157895
4	IMG_0018	3:35PM	On	297	4	0.210526
4	IMG_0019	4:35PM	On	297	0	0
4	IMG_0020	5:35PM	On	298	1	0.0526316
4	IMG_0021	6:35PM	On	297	-1	-0.0526316
4	IMG_0022	7:35PM	Off	308	11	0.578947
4	IMG_0023	8:35PM	Off	314	6	0.315789
4	IMG_0024	9:35PM	Off	326	12	0.631579
4	IMG_0025	10:35PM	Off	330	4	0.210526
4	IMG_0026	11:35PM	Off	340	10	0.526316
3	IMG_0002	10:35PM	Off	19	0	0
3	IMG_0003	11:35PM	Off	23	4	0.25
3	IMG_0004	12:35AM	Off	24	1	0.0625
3	IMG_0005	1:35AM	Off	54	30	1.875
3	IMG_0006	2:35AM	Off	157	103	6.4375
3	IMG_0007	3:35AM	Off	201	44	2.75
3	IMG_0008	4:35AM	Off	238	37	2.3125
3	IMG_0009	5:35AM	Off	249	11	0.6875
3	IMG_0010	6:35AM	Off	264	15	0.9375
3	IMG_0011	7:35AM	On	261	0	0
3	IMG_0012	8:35AM	On	262	1	0.0625
3	IMG_0013	9:35AM	On	269	7	0.4375
3	IMG_0014	10:35AM	On	260	0	0
3	IMG_0015	11:35AM	On	260	0	0
3	IMG_0016	12:35PM	On	264	4	0.25
3	IMG_0017	1:35PM	On	264	0	0
3	IMG_0018	2:35PM	On	264	0	0
3	IMG_0019	3:35PM	On	263	0	0
3	IMG_0020	4:35PM	On	266	3	0.1875
3	IMG_0021	5:35PM	On	265	0	0
3	IMG_0022	6:35PM	On	267	2	0.125
3	IMG_0023	7:35PM	Off	272	5	0.3125
3	IMG_0024	8:35PM	Off	267	0	0
3	IMG_0025	9:35PM	Off	268	1	0.0625
3	IMG_0026	10:35PM	Off	268	0	0
3	IMG_0027	11:35PM	Off	272	4	0.25
2	IMG_0106	4:35PM	On	0	0	0
2	IMG_0107	5:35PM	On	1	1	0.0555556
2	IMG_0108	6:35PM	On	2	1	0.0555556
2	IMG_0109	7:35PM	Off	5	3	0.166667
2	IMG_0110	8:35PM	Off	9	4	0.222222
2	IMG_0111	9:35PM	Off	14	5	0.277778
2	IMG_0112	10:35PM	Off	16	2	0.111111
2	IMG_0113	11:35PM	Off	22	6	0.333333
2	IMG_0114	12:35AM	Off	69	47	2.61111
2	IMG_0115	1:35AM	Off	139	70	3.88889
2	IMG_0116	2:35AM	Off	158	19	1.05556
2	IMG_0117	3:35AM	Off	190	32	1.77778
2	IMG_0118	4:35AM	Off	207	17	0.944444
2	IMG_0119	5:35AM	Off	218	11	0.611111
2	IMG_0120	6:35AM	Off	221	3	0.166667
2	IMG_0121	7:35AM	On	229	8	0.444444
2	IMG_0122	8:35AM	On	235	6	0.333333
2	IMG_0123	9:35AM	On	239	4	0.222222
2	IMG_0124	10:35AM	On	233	0	0
2	IMG_0125	11:35AM	On	220	0	0
2	IMG_0126	12:35PM	On	173	0	0
2	IMG_0127	1:35PM	On	177	4	0.222222
2	IMG_0128	2:35PM	On	179	2	0.111111
2	IMG_0129	3:35PM	On	179	0	0
2	IMG_0130	4:35PM	On	179	0	0
2	IMG_0133	5:35PM	On	188	9	0.5
1	IMG_0033	4:18PM	On	11	0	0
1	IMG_0034	5:18PM	On	14	3	0.15
1	IMG_0035	6:18PM	On	15	1	0.05
1	IMG_0036	7:18PM	Off	19	4	0.2
1	IMG_0037	8:18PM	Off	20	1	0.05
1	IMG_0038	9:18PM	Off	24	4	0.2
1	IMG_0039	10:18PM	Off	27	3	0.15
1	IMG_0040	11:18PM	Off	37	10	0.5
1	IMG_0041	12:18AM	Off	107	70	3.5
1	IMG_0042	1:18AM	Off	196	89	4.45
1	IMG_0043	2:18AM	Off	274	78	3.9
1	IMG_0044	3:18AM	Off	335	61	3.05
1	IMG_0045	4:18AM	Off	412	77	3.85
1	IMG_0046	5:18AM	Off	449	37	1.85
1	IMG_0047	6:18AM	Off	481	32	1.6
1	IMG_0048	7:18AM	On	480	0	0
1	IMG_0049	8:18AM	On	485	5	0.25
1	IMG_0050	9:18AM	On	489	4	0.2
1	IMG_0051	10:18AM	On	487	0	0
1	IMG_0052	11:18AM	On	487	0	0
1	IMG_0053	12:18PM	On	489	2	0.1
1	IMG_0054	1:18PM	On	489	0	0
1	IMG_0055	2:18PM	On	489	0	0
1	IMG_0056	3:18PM	On	489	0	0
1	IMG_0057	4:18PM	On	489	0	0

## Sheet: Mitotic Index
Anemone	Host	Egesta
2	0.00220946	0.0171103
5	0.00986547	0.0172144
8	0.00524476	0.00727802
9	0.00582643	0.00889328
13	0.00944081	0.0104396
14	0.0160502	0.0230665
19	0.00385414	0.0155945
25	0.00469778	0.00718133

## Sheet: FvFm
Day	Treatment	Replicate	FvFm
0	Anemone	1	0.5399
0	Anemone	2	0.5938
0	Anemone	3	0.5796
0	Anemone	4	0.6043
0	Anemone	5	0.6072
0	Anemone	6	0.6156
0	Anemone	7	0.5168
0	Anemone	8	0.6298
0	Anemone	9	0.4936
0	Culture	1	0.4562
0	Culture	2	0.4725
0	Culture	3	0.4555
0	Culture	4	0.447
0	Culture	5	0.4527
1	Culture	1	0.4512
1	Culture	2	0.4158
1	Culture	3	0.4192
1	Culture	4	0.4093
1	Culture	5	0.43
2	Culture	1	0.4073
2	Culture	2	0.4226
2	Culture	3	0.4307
2	Culture	4	0.4383
2	Culture	5	0.4467
3	Culture	1	0.4056
3	Culture	2	0.4145
3	Culture	3	0.3684
3	Culture	4	0.4258
3	Culture	5	0.4384
4	Culture	1	0.3937
4	Culture	2	0.4079
4	Culture	3	0.4105
4	Culture	4	0.4532
4	Culture	5	0.4292
0	Disrupted	1	0.5866
0	Disrupted	2	0.5635
0	Disrupted	3	0.5825
0	Disrupted	4	0.56
0	Disrupted	5	0.5976
1	Disrupted	1	0.4489
1	Disrupted	2	0.4964
1	Disrupted	3	0.4863
1	Disrupted	4	0.4915
1	Disrupted	5	0.4415
2	Disrupted	1	0.4116
2	Disrupted	2	0.5117
2	Disrupted	3	0.4869
2	Disrupted	4	0.4218
2	Disrupted	5	0.3971
3	Disrupted	1	0.1889
3	Disrupted	2	0.3963
3	Disrupted	3	0.3286
3	Disrupted	4	0.2321
3	Disrupted	5	0.255
4	Disrupted	1	0.157
4	Disrupted	2	0.2234
4	Disrupted	3	0.1735
4	Disrupted	4	0.1976
4	Disrupted	5	0.2035
0	Whole	1	0.5602
0	Whole	2	0.5672
0	Whole	3	0.54
0	Whole	4	0.5608
0	Whole	5	0.5372
1	Whole	1	0.4036
1	Whole	2	0.4126
1	Whole	3	0.5383
1	Whole	4	0.4337
1	Whole	5	0.6077
2	Whole	1	0.4735
2	Whole	2	0.477
2	Whole	3	0.472
2	Whole	4	0.5271
2	Whole	5	0.4855
3	Whole	1	0.2938
3	Whole	2	0.427
3	Whole	3	0.401
3	Whole	4	0.4238
3	Whole	5	0.4401
4	Whole	1	0.1301
4	Whole	2	0.1551
4	Whole	3	0.3214
4	Whole	4	0.5049
4	Whole	5	0.2324

## Sheet: Symbiont density
Anemone	Inoculate	Tentacle	Symbionts	Tentacle Surface area (mm)
2	Culture	1	5	0.112
2	Culture	2	3	0.198
2	Culture	3	0
6	Culture	1	4	0.15
6	Culture	2	2	0.1
6	Culture	3	0
10	Culture	1	8	0.157
10	Culture	2	9	0.261
10	Culture	3	3	0.184
13	Culture	1	6	0.215
13	Culture	2	8	0.131
13	Culture	3	2	0.176
14	Culture	1	0
14	Culture	2	0
14	Culture	3	0
15	Culture	1	0	0.093
15	Culture	2	1	0.106
15	Culture	3	3	0.111
28	Culture	1	1	0.117
28	Culture	2	4	0.085
28	Culture	3	6	0.145
34	Culture	1	2	0.071
34	Culture	2	0
34	Culture	3	0
35	Culture	1	4	0.111
35	Culture	2	1	0.098
35	Culture	3	2	0.074
1	Egesta	1	4	0.094
1	Egesta	2	2	0.12
1	Egesta	3	0
4	Egesta	1	4	0.141
4	Egesta	2	6	0.159
4	Egesta	3	15	0.157
17	Egesta	1	2	0.072
17	Egesta	2	0
17	Egesta	3	0
19	Egesta	1	1	0.224
19	Egesta	2	6	0.204
19	Egesta	3	4	0.276
20	Egesta	1	0
20	Egesta	2	0
20	Egesta	3	0
30	Egesta	1	5	0.19
30	Egesta	2	18	0.246
30	Egesta	3	6	0.149
32	Egesta	1	3	0.093
32	Egesta	2	5	0.082
32	Egesta	3	0
38	Egesta	1	1	0.126
38	Egesta	2	1	0.131
38	Egesta	3	0
39	Egesta	1	1	0.067
39	Egesta	2	2	0.156
39	Egesta	3	0
3	FIS	1	6	0.093
3	FIS	2	6	0.16
3	FIS	3	6	0.177
7	FIS	1	24	0.138
7	FIS	2	23	0.127
7	FIS	3	7	0.078
8	FIS	1	7	0.22
8	FIS	2	7	0.119
8	FIS	3	10	0.131
16	FIS	1	3	0.144
16	FIS	2	6	0.23
16	FIS	3	10	0.158
18	FIS	1	11	0.159
18	FIS	2	40	0.143
18	FIS	3	8	0.142
21	FIS	1	23	0.216
21	FIS	2	51	0.219
21	FIS	3	37	0.15
23	FIS	1	2	0.126
23	FIS	2	0
23	FIS	3	2	0.172
25	FIS	1	1	0.102
25	FIS	2	4	0.148
25	FIS	3	0
29	FIS	1	1	0.175
29	FIS	2	3	0.133
29	FIS	3	11	0.216

## Sheet: qPCR raw data
Gene	Sample	Average Ct from two technical replicates
s6_422	Culture 1	27.0334
s6_422	Culture 2	26.2029
s6_422	Culture 3	27.5655
s6_422	Egesta 1	22.2513
s6_422	Egesta 2	22.0017
s6_422	Egesta 3	21.8394
s6_422	FIS 1	22.3336
s6_422	FIS 2	23.1411
s6_422	FIS 3	24.778
s6_27894	Culture 1	31.1169
s6_27894	Culture 2	29.1205
s6_27894	Culture 3	32.9684
s6_27894	Egesta 1	26.6871
s6_27894	Egesta 2	26.857
s6_27894	Egesta 3	26.6305
s6_27894	FIS 1	26.5625
s6_27894	FIS 2	26.857
s6_27894	FIS 3	26.6305
s6_34	Culture 1	27.8777
s6_34	Culture 2	27.3552
s6_34	Culture 3	27.8807
s6_34	Egesta 1	23.8712
s6_34	Egesta 2	23.1428
s6_34	Egesta 3	23.0119
s6_34	FIS 1	24.1019
s6_34	FIS 2	24.7625
s6_34	FIS 3	25.2224
s6_38207	Culture 1	25.0524
s6_38207	Culture 2	24.4829
s6_38207	Culture 3	26.8749
s6_38207	Egesta 1	21.4059
s6_38207	Egesta 2	21.629
s6_38207	Egesta 3	21.5539
s6_38207	FIS 1	21.7849
s6_38207	FIS 2	22.4525
s6_38207	FIS 3	24.2431
psbA	Culture 1	16.9703
psbA	Culture 2	16.8983
psbA	Culture 3	17.2237
psbA	Egesta 1	19.5266
psbA	Egesta 2	19.7583
psbA	Egesta 3	19.7506
psbA	FIS 1	19.1832
psbA	FIS 2	19.6007
psbA	FIS 3	20.2754
s6_35311	Culture 1	25.0731
s6_35311	Culture 2	25.3432
s6_35311	Culture 3	26.0254
s6_35311	Egesta 1	26.5222
s6_35311	Egesta 2	26.137
s6_35311	Egesta 3	25.5827
s6_35311	FIS 1	27.3761
s6_35311	FIS 2	27.7516
s6_35311	FIS 3	29.0646
s6_5551	Culture 1	30.4723
s6_5551	Culture 2	30.3258
s6_5551	Culture 3	31.4661
s6_5551	Egesta 1	30.7121
s6_5551	Egesta 2	30.6661
s6_5551	Egesta 3	30.4507
s6_5551	FIS 1	31.2362
s6_5551	FIS 2	30.7434
s6_5551	FIS 3	31.3353
Cyclophilin	Culture 1	24.8551
Cyclophilin	Culture 2	24.3406
Cyclophilin	Culture 3	25.4141
Cyclophilin	Egesta 1	23.6794
Cyclophilin	Egesta 2	23.2606
Cyclophilin	Egesta 3	23.2146
Cyclophilin	FIS 1	23.8886
Cyclophilin	FIS 2	24.7927
Cyclophilin	FIS 3	26.4904
