# Supplementary material for: Algae from Aiptasia egesta are robust representations of Symbiodiniaceae in the free-living state
Source: PeerJ. 2022 Jul 29;10:e13796. doi: 10.7717/peerj.13796 (PMC9341449; doi:10.7717/peerj.13796)
Supplement: Supplemental Information 1 — Individual primers including primer efficiencies for each gene tested. [file peerj-10-13796-s001.xlsx]

## Sheet: Sheet1
transcript ID	Gene Annotation	Forward primer	Reverse Primer	Primer Efficiency
s6_38207	AMT1-related	AGATGAAGCTAGTCATGAAG	TGTGGAATGCAACTCTGATG	0.91
s6_422	Nitrate transporter	TGTTTGCACATCAGGAAC	AAATCGCTCCAACAATGTG	0.91
s6_27894	Purine nucleoside permease	AGCTGACTCATATGGTAAG	TGATGGGCATTTTGTCGAAC	1.17
s6_34	Nitrate reductase	TGATGATGTATTCGGGTTTG	TCAGACAAGCCTTCGGAAAATC	0.99
s6_5551	Glutamine synthetase	TCGCTGAGTATGTATGGTTG	GTTCCAAGTACGAAGACCTT	0.92
psbA	Photosystem II protein D1 precursor	TCAGCACCTGTTGTTGCAG	AATACTCCAGCTACTCCTAG	1.01
s6_35311	SWEET 1	GTAATGTTCTGAGCATTGCC	AATCCGACTGAGAGGTAGAA	1.03
Cyclophilin	Cyclophilin	TGCTTGAGGGTAAAGTTCTC	CAACCCCTTCATTTCAAAGG	0.93
